# Supplementary material
Source: publisher figshare collection journal article supplement (https://gsajournals.figshare.com/articles/dataset/_/7370948)
Supplement: Supplementary file 1 [file 1]

## Sheet: Sheet1
Table S4. The BLUP values of the wild-type (WT) and mutant (MT) siblings of the F1 hybrids of Oy1-N1989/oy1:B73 with respective maize diversity lines (MDL). Information on the inbred lines from maize association panel (referred to as 302) was adapted from Flint-Garcia et al. 2005.
Inbred	State/Country	Panel Type	Pedigree	WT_CCMI	MT_CCMI	Ratio_CCMI	Diff_CCMI	WT_CCMII	MT_CCMII	Ratio_CCMII	Diff_CCMII
F10	Puy-de-Dome, France	Ames	Etoile de Normandie variety	54.91	10.67	0.21	44.34	76.84	32.81	0.37	49.65
F431	.	Ames	.	66.77	9.09	0.12	57.56	78.97	38.01	0.46	44.49
GE440	North Carolina	Ames	Hastings Prolific	60.34	9.42	0.16	51.15	68.42	22.56	0.34	44.04
Hi33	Hawaii	Ames	(M14 x CI187-2)Oh45)BC1	62.22	8.56	0.14	53.79	68.15	28.31	0.43	38.44
HY2	.	Ames	.	57.83	2.74	0.05	52.95	67.11	9.63	0.15	54
IA5125B	Iowa	Ames	Unknown	54.52	5.67	0.11	47.32	71.69	14.98	0.21	55.44
LH1	USA	Ames	Check PVP certificate	66.76	7.96	0.11	59.17	78.59	21.81	0.27	58.71
LH119	USA	Ames	Check PVP certificate	58.75	8.7	0.15	49.89	69.25	29.71	0.44	38.67
LH123HT	USA	Ames	Check PVP certificate	59.51	11.22	0.19	49.01	73.16	30.15	0.41	43.64
LH127	USA	Ames	Check PVP certificate	65.34	11.91	0.17	54.93	68.43	24.35	0.37	42.41
LH128	USA	Ames	Check PVP certificate	58.63	10.02	0.17	48.86	72.83	44.43	0.6	30.21
LH132	USA	Ames	Check PVP certificate	56.58	9.53	0.18	46.94	70.95	37.39	0.54	34.02
LH145	USA	Ames	Check PVP certificate	55.76	8.9	0.17	46.48	72.41	21.03	0.29	50.92
LH146Ht	USA	Ames	Check PVP certificate	54.14	7.62	0.15	46.22	67.33	22.08	0.33	44.86
LH149	USA	Ames	Check PVP certificate	60	7.94	0.14	51.78	71.48	26.35	0.37	44.79
LH150	USA	Ames	Check PVP certificate	66.99	7.06	0.1	60.05	75.47	17.3	0.23	58.52
LH160	USA	Ames	Check PVP certificate	61.48	8.89	0.15	52.75	78.3	29.55	0.36	51.27
LH193	USA	Ames	Check PVP certificate	61.83	9.03	0.14	53.04	64.83	29.83	0.51	32.48
LH194	USA	Ames	Check PVP certificate	60	8.04	0.14	51.71	74.28	22.98	0.31	51.71
LH195	USA	Ames	Check PVP certificate	63.47	10.07	0.15	54.12	71.5	40.72	0.57	31.75
LH196	USA	Ames	Check PVP certificate	53.16	6.81	0.14	45.06	70.76	32.44	0.46	38.26
LH202	USA	Ames	Check PVP certificate	56.62	5.03	0.09	50.06	66.06	25.99	0.41	37.67
LH205	USA	Ames	Check PVP certificate	55.33	.	.	.	69.58	.	.	.
LH208	USA	Ames	Check PVP certificate	61.71	10.84	0.17	51.68	76.11	24.58	0.32	52.78
LH220Ht	USA	Ames	Check PVP certificate	56.6	5.98	0.1	53	71.61	23.18	0.34	45.29
LH38	USA	Ames	Check PVP certificate	65.04	.	.	.	69.64	.	.	.
LH39	USA	Ames	Check PVP certificate	54.78	6.99	0.14	46.71	62.94	16.94	0.29	41.6
LH51	USA	Ames	Check PVP certificate	64.66	2.98	0.05	60.28	73.93	13.26	0.18	60.08
LH52	USA	Ames	Check PVP certificate	56.92	2.56	0.05	52.07	70.89	9.1	0.13	59.68
LH54	USA	Ames	Check PVP certificate	49.7	3.1	0.07	43.8	75.02	10.9	0.15	63.73
LH57	USA	Ames	Check PVP certificate	58.93	3.17	0.06	53.86	75.36	10.82	0.15	64.27
LH59	USA	Ames	Check PVP certificate	60.65	3.68	0.06	53.68	69.38	13.59	0.21	52.55
LH61	USA	Ames	Check PVP certificate	59.4	2.53	0.05	54.82	77.87	10.6	0.14	67.91
LH65	USA	Ames	Check PVP certificate	64.17	2.56	0.04	60.03	75.25	11.05	0.15	63.91
LH74	USA	Ames	Check PVP certificate	56.16	6.97	0.13	48.24	70.42	32.74	0.47	37.52
LH82	USA	Ames	Check PVP certificate	53.95	8.39	0.17	44.83	69.38	26.02	0.38	42.21
LH85	USA	Ames	Check PVP certificate	61.12	7.77	0.13	53.12	76.72	18.38	0.24	59.26
Mo16W	Missouri	Ames	Pipe Corn	58.03	13.77	0.24	45.64	71.67	46.03	0.64	27.15
Mo20W	Missouri	Ames	N6/Mo22	68.39	8.23	0.12	60.79	70.64	24.42	0.35	45.4
Mo48	Missouri	Ames	(NC33/B52) S6	56.85	12.54	0.24	45.19	74.12	41.86	0.56	34.32
PH9	.	Ames	.	58.96	7.83	0.13	50.72	67.32	19.26	0.3	45.52
PHG29	USA	Ames	Check PVP certificate	59.27	8.8	0.15	50.39	77.11	26.16	0.33	52.71
PHG35	USA	Ames	Check PVP certificate	61.89	7.96	0.13	53.84	75.05	22.92	0.3	52.84
PHG39	USA	Ames	Check PVP certificate	59.66	11.79	0.2	48.78	73.06	39.07	0.53	35.39
PHG47	USA	Ames	Check PVP certificate	61.17	8.55	0.14	52.65	72.7	25.62	0.35	47.14
PHG50	USA	Ames	Check PVP certificate	56.31	8.83	0.16	47.13	72.97	32.05	0.44	41.66
PHG71	USA	Ames	Check PVP certificate	59.68	11.54	0.2	48.97	72.62	25.19	0.35	47.42
PHG72	USA	Ames	Check PVP certificate	63.76	10.24	0.15	54.33	73.25	28.22	0.39	45.52
PHG83	USA	Ames	Check PVP certificate	61.61	2.77	0.05	57.07	72.02	10.75	0.16	59.73
PHG86	USA	Ames	Check PVP certificate	59.73	5.7	0.1	53.01	68.41	15.39	0.23	50.53
PHH93	USA	Ames	Check PVP certificate	61.4	10.16	0.16	51.81	70.23	29.12	0.42	40.54
PHJ31	USA	Ames	Check PVP certificate	64.2	21.74	0.33	46.96	74.87	43.57	0.57	33.79
PHJ33	USA	Ames	Check PVP certificate	59.09	2.49	0.04	54.5	73.34	9.1	0.13	63.05
PHJ40	USA	Ames	Check PVP certificate	56.78	20.14	0.42	40.57	71.19	41.25	0.55	35.8
PHJ70	USA	Ames	Check PVP certificate	67.27	9.39	0.13	58.76	74.11	37.6	0.5	38.18
PHJ75	USA	Ames	Check PVP certificate	58.96	9.06	0.16	49.88	73.04	24.75	0.34	48.41
PHK05	USA	Ames	Check PVP certificate	52	11.01	0.23	40.91	71.58	28.09	0.39	43.34
PHK29	USA	Ames	Check PVP certificate	56.69	2.89	0.05	51.6	67.55	8.04	0.13	56.06
PHK35	USA	Ames	Check PVP certificate	63.4	10.87	0.17	53.51	72.36	44.11	0.6	29.85
PHK42	USA	Ames	Check PVP certificate	62.88	12.08	0.19	52.11	71.26	28.36	0.41	42.66
PHK76	USA	Ames	Check PVP certificate	68.64	4.02	0.06	63.92	74.93	13	0.17	61.69
PHM49	USA	Ames	Check PVP certificate	59.58	6.41	0.11	52.37	77.91	25.16	0.32	54.73
PHM57	USA	Ames	Check PVP certificate	65.84	22.9	0.33	47.97	76.98	47.74	0.6	32.9
PHN11	USA	Ames	Check PVP certificate	59.1	9.53	0.17	49.71	69.96	26.29	0.38	42.76
PHN29	USA	Ames	Check PVP certificate	62.41	7.6	0.12	54.66	75.93	25.19	0.32	51.97
PHN37	USA	Ames	Check PVP certificate	61.86	8.41	0.14	53.5	75.8	27.21	0.35	49.95
PHN73	USA	Ames	Check PVP certificate	56.93	9.69	0.17	49.87	62.67	.	.	.
PHN82	USA	Ames	Check PVP certificate	65.23	11.59	0.17	55.03	74.08	32.56	0.43	42.72
PHP02	USA	Ames	Check PVP certificate	63.62	9.5	0.15	54.68	75.68	30.14	0.39	47.12
PHP55	USA	Ames	Check PVP certificate	61.07	10.85	0.18	50.97	75.52	27.85	0.36	48.99
PHP60	USA	Ames	Check PVP certificate	63.94	9.97	0.15	54.72	74.06	36.72	0.49	38.9
PHR25	USA	Ames	Check PVP certificate	54.72	8.39	0.16	45.68	72.5	28.4	0.39	44.34
PHR32	USA	Ames	Check PVP certificate	62.3	9.21	0.15	53.43	77.68	33.19	0.41	47.1
PHR36	USA	Ames	Check PVP certificate	62.41	8.73	0.14	53.88	71.79	27.43	0.38	44.23
PHR47	USA	Ames	Check PVP certificate	55.99	8.86	0.17	46.76	70.19	33.25	0.48	36.74
PHR62	USA	Ames	Check PVP certificate	63.8	8.39	0.13	55.64	67.5	22.8	0.35	42.55
PHT10	USA	Ames	Check PVP certificate	63.58	9.54	0.15	54.62	72.95	31.09	0.42	42.5
PHT22	USA	Ames	Check PVP certificate	58.87	9.01	0.16	49.81	77.02	35.29	0.44	44.28
PHT55	USA	Ames	Check PVP certificate	66.95	9.71	0.14	58.2	75.85	37.16	0.47	40.97
PHT60	USA	Ames	Check PVP certificate	57.74	7.82	0.14	49.39	70.04	23.09	0.34	45.78
PHT77	USA	Ames	Check PVP certificate	59.59	15.64	0.26	46.07	72.39	42.53	0.58	31.33
PHV37	USA	Ames	Check PVP certificate	56.88	2.34	0.05	52.19	68.31	8.61	0.13	56.57
PHV63	USA	Ames	Check PVP certificate	58.98	2.46	0.04	54.41	72.33	8.35	0.12	62.35
PHV78	USA	Ames	Check PVP certificate	59.66	10.15	0.17	49.91	74.08	30.85	0.41	44.29
PHW03	USA	Ames	Check PVP certificate	56.41	10.5	0.19	46.1	71.84	41.7	0.58	31.32
PHW17	USA	Ames	Check PVP certificate	64.98	8.29	0.12	57.01	68.71	31.87	0.47	35.96
PHW20	USA	Ames	Check PVP certificate	62.6	10.81	0.17	52.67	71.14	19.4	0.28	50.65
PHW43	USA	Ames	Check PVP certificate	52.32	6.19	0.13	44.56	69.27	18.8	0.28	48.62
PHW52	USA	Ames	Check PVP certificate	61.06	11.59	0.19	50.46	70.7	35.32	0.5	35.56
PHW65	USA	Ames	Check PVP certificate	58.45	11.37	0.2	47.74	77.79	32.06	0.4	48.28
PHW79	USA	Ames	Check PVP certificate	61.33	9.75	0.16	52	73.38	34.47	0.46	40.02
PHZ51	USA	Ames	Check PVP certificate	58.98	9.08	0.16	49.88	75.11	31.88	0.42	44.76
W32	Wisconsin	Ames	Unknown	56.78	9.15	0.18	47.42	69.73	29.23	0.43	39.77
Yu796	North Carolina	Ames	Unknown	61.29	10.62	0.17	51.36	76.65	20.03	0.26	57.66
33-16	Indiana	302	Lux Johnson Country white	61.98	9.77	0.15	52.7	74.69	31.92	0.42	44.14
38-11	Indiana	302	Outcross in line from 176A	56.79	9.11	0.17	47.47	69.26	21.05	0.31	46.57
81-1	USDA	302	Iowa 60*Edisto	56.71	8.35	0.15	47.9	70.84	24.61	0.35	45.5
A188	Minnesota	302	[(4-29*64)4-29(4)]	61.37	6.3	0.1	54.4	79.69	20.4	0.25	61.51
A214N	South Africa	302	(B68*HtN)B68(3)	64.4	10.37	0.15	54.94	71.92	30.15	0.42	41.94
A239	Minnesota	302	A73*A347	57.08	8.7	0.16	48.06	67.52	19.54	0.3	45.54
A441-5	South Africa	302	Robyn*Leamming yellow dent	58.32	8.72	0.15	49.4	66.67	23.86	0.38	40.44
A554	Minnesota	302	[(WD*Wf9)WD(2))]	53.57	7.06	0.14	45.34	72.85	20.96	0.29	51.59
A619	Minnesota	302	[(A171*Oh43)Oh43]	53.91	6.28	0.13	46.24	65.6	17.91	0.29	44.38
A632	Minnesota	302	[(Mt42*B14)B14(3)]	60.64	11.52	0.19	50.03	72.47	29.32	0.4	43.47
A634	Minnesota	302	[(Mt42*B14)B14(2)]	57.2	9.93	0.18	47.35	73.72	26.91	0.36	47.36
A635	Minnesota	302	ND203xB14(3)	53.68	10.07	0.2	43.4	76.54	33.52	0.43	45.23
A641	Minnesota	302	ND203*B14	57.75	8.2	0.15	49.13	75.71	22.08	0.29	54.5
A654	Minnesota	302	A116*Wf9	54.13	6.93	0.14	46.04	66.82	16.01	0.25	47.8
A659	Minnesota	302	Minnesota Synthetic 3	61.39	8.13	0.13	53.18	69.12	34.13	0.5	34.47
A661	Minnesota	302	Minnesota Synthetic AS-A	51.08	6.47	0.15	43	70.8	21.78	0.31	48.02
A679	Minnesota	302	[(A662*B73) B73(3)]	55.61	8.82	0.17	46.37	70.01	28.38	0.41	40.92
A680	Minnesota	302	[(A662*B73) B73(3)]	59.44	6.07	0.11	52.44	69.2	27.73	0.41	40.4
A682	Minnesota	302	[(AS-D*Mo17) Mo17 (2)]	59.04	2.26	0.04	54.61	68.78	10.21	0.16	55.78
Ab28A	Alabama	302	GT152*38-11	62.7	17.19	0.26	48.42	77.43	51.23	0.64	30.34
B10	Iowa	302	Iowa Stiff Stalk Synthetic	55.86	8.49	0.16	46.86	72.58	32.63	0.45	40.59
B103	Iowa	302	CIMMYT Pool 41 [Northern Temperate Ranges -1 (NTR-1)]	57.27	8.78	0.16	48.21	70.16	25.35	0.37	43.89
B104	Iowa	302	BS13(S)C5	60.1	7.31	0.12	52.32	68.92	37.17	0.55	31.43
B105	Iowa	302	BSSS®C9	60.84	5.94	0.1	54.07	73.65	22.51	0.3	51.27
B109	Iowa	302	[B73 * BS20(S)C1]B73	62.81	9.53	0.15	53.78	70.99	29.01	0.41	41.71
B14A	Iowa	302	Cuzco*B14(8)	60.95	16.62	0.27	46.89	71.32	42.63	0.59	29.76
B164	Minnesota	302	Indiana Reid (Pioneer)	56.08	4.99	0.09	49.5	72.85	15.52	0.22	56.53
B2	Missouri	302	Reid Yellow Dent	61.22	3.39	0.06	56.22	75.9	15.2	0.2	61.02
B37	Iowa	302	Iowa Stiff Stalk Synthetic	68.69	7.75	0.11	61.43	76.37	31.11	0.4	47.19
B46	Iowa	302	W22*B10	61.09	3.99	0.07	55.67	71.68	16.66	0.24	53.89
B57	Iowa	302	Midland	53.59	9.85	0.2	43.45	69.66	30.06	0.44	38.91
B64	Iowa	302	41.2504B*B14(3)	61.87	5.02	0.08	55.82	71.07	15.63	0.23	53.99
B68	Iowa	302	41.2504B*B14(3)	59.76	8.66	0.14	51.03	74.93	26.42	0.35	49.47
B73	Iowa	302	Iowa Stiff Stalk Synthetic C5	57.43	6.84	0.12	50.49	67.19	27.67	0.42	39.36
B73 Htrhm	Iowa	302	Ht1 and rhm1 conversion of B73	63.03	7.77	0.12	55.22	68.45	30.75	0.46	36.63
B76	Iowa	302	[(CI.31A*B37)B37]	57.09	7.35	0.13	48.99	72.53	24.07	0.33	48.32
B77	Iowa	302	Pioneer Two-Ear composite(BS11)	59.36	8.4	0.14	50.76	71.02	23.29	0.34	46.95
B79	Iowa	302	Iowa Two-Ear Synthetic No.1(BSTE)	54.85	7.94	0.15	46.13	67.24	21.75	0.34	43.15
B84	Iowa	302	BS13(S2)C0	62.57	10.22	0.16	53.04	74.93	40.73	0.54	36.45
B97	Iowa	302	BSCB1®C9	59.83	9.83	0.17	50.31	75.17	31.34	0.41	45.33
C103	Connecticut	302	Lancaster Surecrop (from Noah Hershey)	66.54	2.45	0.04	62.7	70.16	12.69	0.19	55.4
C49A	Minnesota	302	Minn 13	59.91	10.26	0.17	50.1	68.52	34.57	0.51	33.25
CH701-30	Canada - Harrow	302	unknown	63.79	3.74	0.06	58.81	75.33	12.19	0.16	62.97
CH9	Canada - Harrow	302	Funk’s G176	63.08	7.22	0.11	55.65	78.91	19.47	0.24	61.27
CI187-2	USDA	302	Krug	63.56	13.71	0.21	51.74	75.76	44.7	0.58	33.99
CI21E	USDA	302	Hy*C.I.21	60.84	16.08	0.26	47.14	69.99	36.02	0.53	33.95
CI28A	USDA	302	Recovered Blight Resistance B2	58.17	4.11	0.07	52.39	75.88	16.3	0.22	59.99
CI31A	USDA	302	Midland OP	60.45	7.91	0.13	52.29	64.94	24.96	0.41	37.06
CI3A	USDA	302	[(C.I.3*related inbred) C.I.3 (2)]	49.55	7.67	0.21	40.52	70.63	25.01	0.36	44.85
CI44	USDA	302	L97*Oh07(2)	56.54	5.27	0.1	49.81	70.45	21.4	0.31	47.88
CI64	USDA	302	K64*Mo21A	54.98	5.48	0.11	47.95	69.49	19.94	0.29	47.88
CI66	USDA	302	L97*K55 (2)	59.06	7.29	0.13	51.2	73.93	19.74	0.27	54.18
CI7	USDA	302	[(L317*33-16)33-16(2)]	58.49	6.56	0.11	51.07	70.7	18.74	0.27	50.64
CI90C	USDA	302	CI90A = L97*M14	62.79	7.88	0.12	54.88	76.14	24.17	0.31	53.19
CI91B	USDA	302	L97*A71	58.21	13.98	0.25	45.69	77.83	40.98	0.51	40.22
CM105	Canada-Morden	302	CMV3xB14(2)	63.47	2.56	0.04	59.25	72.23	5.87	0.09	64.46
CM174	Canada-Morden	302	CMV3xB14(2)	57.27	6.95	0.13	49.46	73.59	18.45	0.25	54.88
CM37	Canada-Morden	302	KE3	59.22	9.31	0.16	49.99	80.9	22.51	0.27	61.25
CM7	Canada-Morden	302	W85*CMV3	66.55	8.75	0.13	58.41	79.58	21.2	0.26	60.63
CML10	Mexico	302	Pop.21 = Tuxpeño	62.06	11.89	0.19	51.34	64.26	38.38	0.64	23.91
CML103	Mexico	302	Pop. 44	57.1	6.43	0.12	49.63	74.36	18.01	0.24	56.35
CML108	Mexico	302	Pop. 44	55.48	3	0.06	50.2	61.44	10.96	0.2	44.98
CML154Q	Mexico	302	Pop. 62	65.55	20.31	0.29	49.41	75.77	47.79	0.61	31.19
CML157Q	Mexico	302	Pop. 62	61.28	4.63	0.08	55.44	72.21	13.1	0.18	57.86
CML158Q	Mexico	302	Pop. 62	66.27	4.47	0.07	61.03	75.18	18.79	0.25	56.76
CML218	Mexico	302	EV = Streak resist. source	59.32	16.62	0.28	45.11	75.69	44.61	0.58	33.98
CML228	Mexico	302	Suwan-1/SR	62.14	6.65	0.11	55.01	70.61	28.45	0.41	41.68
CML247	Mexico	302	Pool 24 (Tuxpeño)	66.25	3.37	0.05	61.75	76.57	14.7	0.19	62.39
CML254	Mexico	302	Pop. 21 = Tuxpeño Sequia	59.3	4.41	0.08	53.43	73.09	14.61	0.2	57.69
CML277	Mexico	302	Pop. 43 = La Posta (Tux.)	63.36	6.02	0.09	56.78	69.61	16.3	0.24	51.38
CML311	Mexico	302	Pop. 500 = Inter. Mat. Wh. Dent Mix	61.1	8.25	0.13	52.77	79.29	32.21	0.39	50.22
CML314	Mexico	302	Pop. 600 = Late Mat. Wh. Dent Mix	60.27	16.98	0.28	45.9	73.43	34.86	0.47	39.73
CML321	Mexico	302	Pop. 502 = Mex. DK + US	59.25	4.36	0.08	53.4	70.57	11.21	0.17	57.32
CML322	Mexico	302	Recyc. US + Mex	61.1	4.83	0.08	55.11	72.34	21.38	0.3	50.51
CML323	Mexico	302	Pop. 33 Amar. Subtrop. Mix	57.09	7.48	0.15	48.91	71.55	24.61	0.35	46.48
CML331	Mexico	302	Suwan/Pop.47 * Mp78:518	58.16	8.07	0.14	49.68	69.91	21.71	0.32	46.86
CML332	Mexico	302	Suwan/Pop.47 * Mp78:518	62.01	8.76	0.14	53.42	66.04	19.03	0.31	43.98
CML333	Mexico	302	Pop. 590	57.37	2.84	0.05	52.39	71.12	12.82	0.19	56.61
CML341	Mexico	302	Pop. 43 = La Posta (Tux.)	60.23	3.19	0.06	55.27	75.88	9.37	0.13	66.3
CML38	Mexico	302	Pop. 32	61.54	17.38	0.28	47.01	70.83	45.41	0.66	26.56
CML45	Mexico	302	Pop. 43 = La Posta (Tux.)	56.35	2.91	0.06	51.22	79.84	9.89	0.12	71.28
CML52	Mexico	302	Pop. 79 = STA ROSA	61.78	7.28	0.12	54.18	69.73	19.12	0.28	48.97
CML69	Mexico	302	Pop. 36 = Cogollero (Caribbean)	66.51	9.85	0.14	57.61	70.75	27.43	0.39	42.8
CML91	Mexico	302	Pop. 42 Northern Temp./German Mix	61.61	13.54	0.22	49.73	72.14	36.41	0.51	36.55
CML92	Mexico	302	Pop. 42 Northern Temp./German Mix	60.28	10.45	0.17	50.37	71.72	31.62	0.45	40.32
CMV3	Minnesota	302	A21*W185	55.23	6.42	0.13	47.6	68.41	20.9	0.32	45.52
Co106	Canada-Ottawa	302	University of Wisconsin CR11	51.81	7.9	0.17	42.83	74.51	22.44	0.3	52.53
Co125	Canada-Ontario	302	unknown	57.04	5.44	0.1	50.24	74.53	14.53	0.2	59.75
Co255	Canada-Ottawa	302	INRA 258	60.58	12.23	0.2	49.49	80.68	37.28	0.44	47.51
D940Y	South Africa	302	BO60W(A166NxB566Y-B560Y)B557Y	61.4	12.91	0.21	49.92	68.22	28.54	0.43	38.31
DE1	Delaware B	302	P3140*P3751	56.48	6.84	0.13	48.67	70.3	22.49	0.33	46.69
DE2	Delaware B	302	P3140*P3751	56.78	7.3	0.13	48.69	68.88	23.87	0.36	43.47
DE811	Delaware	302	[B68*[B37Ht*(C103*Mp3204 double cross) Selection]]	66.41	2.42	0.04	62.58	72.05	9.14	0.13	61.24
E2558W	South Africa	302	N6*M162W^3	53.53	11.82	0.24	42.04	71.7	34.47	0.48	37.71
EP1	Spain	302	Spanish population ‘Lizargarate’	53.66	10.6	0.21	43.02	82.44	49.75	0.56	38.58
F2	Puy-de-Dome, France	302	OP Lacaune	59.08	18.41	0.31	43.63	69.57	50.25	0.74	20.42
F2834T	South Africa	302	Teko Yellow	60.56	5.35	0.09	54.17	72.68	21.35	0.29	50.99
F44	Florida	302	Smith (Old Florida variety)	59.76	9.07	0.15	50.75	69.99	32.62	0.47	37.03
F7	France-Peronne	302	OP Lacaune	56.66	8.48	0.16	47.75	77.82	26.52	0.33	53.36
GA209	Georgia	302	T61*NC37	61.35	5.8	0.09	54.73	72.56	13.78	0.19	57.72
GT112	Georgia	302	Multiple cross (includes Whatley, Cuban, Garrick, Creole, and 12% other)	59.51	11.22	0.19	49.01	67.22	32.41	0.5	33.42
H100	Indiana	302	N28*H91	61.42	9.92	0.16	51.99	78.21	28.77	0.35	51.85
H105W	Indiana	302	33-16*A632(3)	62.39	8.77	0.14	53.83	73.13	21.87	0.3	51.14
H84	Indiana	302	[B37*GE440)Ht Ht	63.78	14.29	0.22	51.59	75.77	41.42	0.53	36.99
H91	Indiana	302	[B37*GE440)B14(4)]Ht Ht	53.67	9.8	0.2	43.57	74.45	24.65	0.33	50.43
H95	Indiana	302	Oh43*C.I.90A	62.32	8.09	0.13	54.22	67.4	22.83	0.35	42.38
H99	Indiana	302	Illinois Synthetic 60C	60.75	8.25	0.13	52.39	71.45	32.16	0.46	39.46
Hi27	Hawaii	302	[CM104(India)*MV source]BC6	63.64	9.73	0.15	54.55	69.52	25.36	0.38	42.99
Hp301	Indiana	302	Supergold	52.11	6.64	0.14	44.02	70.13	18.87	0.27	49.75
I205	Iowa	302	Iodent	60.77	10.94	0.18	50.58	75.36	50.89	0.66	27.81
IA2132	Iowa	302	[(TSR * 45 ) * 4329 ]	53.74	8.58	0.18	44.48	66.72	36.81	0.57	28.73
IA5125	Iowa	302	[(IP39*Tendermost)*IP39]	53.59	5.19	0.11	46.63	72.79	16.42	0.23	55.63
IDS28	Iowa	302	Yellow Pearl	60.93	10.08	0.16	51.34	68.59	30.26	0.45	37.27
IDS69	Iowa	302	South American Popcorn	58.35	7.13	0.13	50.52	72.43	22.91	0.32	49.24
IL677A	Illinois	302	[(Bolivia 1035*IL44b)*IL422a]	54.95	5.33	0.1	48.03	74.06	23.98	0.32	50.51
Ill.Hy	Illinois	302	Illinois High Yield	53.59	2.84	0.06	48.24	66.28	9.17	0.15	53.27
K148	Kansas	302	Yellow selection No. 1 (Pride of Saline, yellow strain)	57.56	11.22	0.2	46.87	73.47	37.51	0.5	37.37
K4	Kansas	302	Kansas Sunflower	54.3	8.04	0.16	45.47	71.01	25.19	0.36	45.21
K55	Kansas	302	Pride of Saline	54.84	6.59	0.13	47.04	72.91	22.32	0.3	50.43
K64	Kansas	302	Pride of Saline	55.14	5.4	0.11	48.18	70.63	21.34	0.31	48.17
Ki11	Thailand	302	Suwan 1(S)C4-S8-18-7	68.56	7.91	0.11	61.18	76.33	20.46	0.26	56.83
Ki14	Thailand	302	Suwan 1(S)C4-S8-19-5	58.54	6.76	0.12	50.99	70.13	23.45	0.34	45.58
Ki21	Thailand	302	Pacific 9-S8-45	57.53	9.2	0.16	48.21	70.9	28.99	0.42	41.6
Ki3	Thailand	302	Suwan 1(S)C4-S8-5-3	59.69	4.25	0.07	53.97	70.94	20.18	0.29	49.67
Ki43	Thailand	302	Suwan 3(S)C3-S7-138	64.98	9.56	0.14	56.13	75.48	26.71	0.35	49.96
KUI2007	Thailand	302	DK version of Ki3; Suwan 1(S)C4-S8-5-3	58.67	10.46	0.18	48.6	74.66	39.38	0.52	37.31
KUI2021	Thailand	302	DK version of Ki9; Suwan 1(S)C4-S8-16-7	59.28	14	0.24	46.85	72.12	44.86	0.62	28.82
KUI44	Thailand	302	KS 6(S)C2-S7-366	61.64	14.62	0.23	49.02	73.98	44.33	0.59	31.87
Ky21	Kentucky	302	Boone County White	60.72	13.49	0.22	48.78	71.43	38.98	0.55	33.24
Ky226	Kentucky	302	NCLauDA*Coahuila 8	64.84	11.52	0.17	54.64	71.08	39.18	0.55	32.57
Ky228	Kentucky	302	Pride of Saline	65.59	12.3	0.18	54.93	76.97	34.62	0.44	44.83
L317	Iowa	302	Lancaster surecrop (from Noah Hershey)	64.05	20.82	0.31	47.42	75.8	44.9	0.58	33.86
L578	Louisiana	302	Unknown	56.89	8.05	0.15	48.3	69.63	27.87	0.41	40.86
M162W	South Africa	302	K64R**2 x B1138T	56.04	6.47	0.12	48.44	68.5	18.32	0.28	48
M37W	South Africa	302	21A**2 x Jellicorse	59.58	8.32	0.14	51.06	71.41	17.06	0.24	53.16
Mo.G	Missouri	302	Mastadon variety from Pennsylvania	63.13	15.29	0.23	50.19	69.25	39.54	0.59	29.72
Mo17	Missouri	302	C.I.187-2*C103	57.94	2.3	0.04	55.39	76.23	9.82	0.13	66.4
Mo18W	Missouri	302	Wf9*Mo22(2)	64.81	9.07	0.13	56.28	74.11	24.47	0.33	50.12
Mo1W	Missouri	302	[Mo22*Wf9(2)]	61.75	8.03	0.13	53.64	76.45	22.68	0.29	54.96
Mo24W	Missouri	302	(K10*K49/Ziler Hi-cob) (pipe corn)	51.29	6.52	0.14	43.2	66.78	17.1	0.27	46.74
Mo44	Missouri	302	Mo22*Pioneer Mexican Synthetic 17	63.21	3.25	0.05	58.51	71.11	11.41	0.17	57.88
Mo45	Missouri	302	Race Negro de Tierra Caliente (Guatemala)	65.7	12.95	0.19	54.61	77.98	44.41	0.55	37.3
Mo46	Missouri	302	Race Cravo Paulista (Brazil)	63.52	3.03	0.05	58.99	76.08	8.55	0.12	67.32
Mo47	Missouri	302	Race Candela (Ecuador)	64.09	12.78	0.19	52.95	76.83	32.07	0.4	46.96
Mp339	Mississippi	302	T61*Hill Yellow Dent	59.85	12.69	0.21	48.38	80.2	30.14	0.36	53.34
MS1334	Michigan	302	[(Golden glow * Maize Amargo)*Golden Glow]	60.06	6.37	0.11	52.92	77.16	14.04	0.18	63.81
MS153	Michigan	302	Iowa stiff stalk synthetic	56.63	12.36	0.23	45.07	72.57	37.49	0.52	36.16
MS71	Michigan	302	A619*R168	60.19	6.97	0.12	52.65	71.53	13.47	0.19	56.58
Mt42	Minnesota	302	Minnesota No.13 (Owen’s)	56.32	10.4	0.19	46.07	77.29	29.75	0.38	49.69
N192	Nebraska	302	CM105*B73	56.42	7.84	0.14	47.93	71.46	33.15	0.47	38.57
N28Ht	Nebraska	302	N28= BSSS	60.5	8.91	0.15	51.66	77.25	31.74	0.4	47.84
N6	Nebraska	302	Hays Golden	61.95	6.97	0.11	54.58	68.05	23.57	0.36	42.61
N7A	Nebraska	302	Oh07*Stiff stalk Synthetic	58.32	8.29	0.15	49.7	70.41	27.93	0.4	41.88
NC222	North Carolina	302	Jarvis Golden Prolific	60.77	13.75	0.22	48.66	71.34	34.26	0.48	37.41
NC230	North Carolina	302	K55*Yellow line or inbred	54.7	7.27	0.14	46.43	74.31	21.31	0.29	53.27
NC232	North Carolina	302	[(T204*Low Ear outcross) T204 (2)]	59.98	6.19	0.11	52.96	68.03	20.89	0.32	45.02
NC250	North Carolina	302	[(Nigeria Composite ARb*B37)B37)	68.2	7.9	0.11	60.8	72.88	25.18	0.35	47.79
NC258	North Carolina	302	TZ(2)*[(NC248*246)*C103]	61.2	16.51	0.27	47.24	73.03	47.65	0.65	27.55
NC260	North Carolina	302	[(Mo44*Mo17)Mo44(3)]	57.49	4.78	0.09	51.18	74.29	12.88	0.18	60.91
NC262	North Carolina	302	TZ (TZ=McNair 14*18)	60.53	11.92	0.2	49.64	74.36	39.19	0.52	37.07
NC264	North Carolina	302	[(SC76*Gaspe)Gaspe]SC76(3)	61.33	10.71	0.17	51.34	70.65	29.13	0.42	41.12
NC268	North Carolina	302	(B73*NC250) B73	53.7	5.96	0.12	46.23	70.88	18.16	0.27	51.42
NC290A	North Carolina	302	McNair inbred lines 14*18 (largely of C103 origin); sister line of NC290	65.4	7.56	0.11	57.95	68.9	27.4	0.41	40.29
NC292	North Carolina	302	[(B73*NC250) B73 (3)]	63.51	8.02	0.12	55.57	68.87	27.12	0.41	40.51
NC294	North Carolina	302	[(B73*NC250) B73]	60.97	6.72	0.11	53.67	72.05	23.46	0.33	48.2
NC298	North Carolina	302	PioneerX105A * H-5 * Agroceres155	69.17	4.77	0.07	63.99	75.13	19.84	0.26	55.75
NC304	North Carolina	302	(H5*PioneerX105A)*H101	67.07	4.32	0.06	62	73.12	16.72	0.23	55.81
NC306	North Carolina	302	(B73*NC250)*B73	63.65	6.53	0.1	56.74	73.78	21.67	0.3	52.21
NC308	North Carolina	302	(B73*NC250)*B73	64.38	8.88	0.13	55.94	68.33	27.6	0.42	39.32
NC310	North Carolina	302	improved B73-type derived from NC250*B73^3	61.34	7.39	0.12	53.63	69.16	24.38	0.36	43.4
NC312	North Carolina	302	(B73*NC250)*B73	67.22	9.15	0.13	58.87	72.25	20.87	0.29	50.84
NC314	North Carolina	302	B73*NC250	61.96	4.91	0.08	56	71.31	19.3	0.27	50.97
NC316	North Carolina	302	(B73Ht1rhm1*NC250)B73Ht1rhm1^3	62.63	7.14	0.11	55.21	69.65	25.95	0.38	42.64
NC318	North Carolina	302	[(SC76*B52)SC76(3)]	63.3	11.22	0.17	53.16	77.57	33.46	0.42	46.7
NC320	North Carolina	302	[(SC76*B52)SC76(3)]	64.47	10.25	0.15	55.11	74.84	28.38	0.37	47.57
NC322	North Carolina	302	[(SC76*B52)SC76(3)]; sister line to NC318	65.82	10.38	0.15	56.5	73.39	39.53	0.53	35.43
NC324	North Carolina	302	B73*NC250	50.52	3.43	0.08	44.48	63.88	13.55	0.23	45.98
NC326	North Carolina	302	[(B73*NC250)*B73(3)]	59.72	7.92	0.13	51.48	73.83	31.3	0.42	43.52
NC328	North Carolina	302	[(B73*NC250)*B73(3)]	62.25	10.04	0.16	52.81	73.6	33.84	0.45	40.9
NC33	North Carolina	302	Weekley’s Improved	62.66	7.9	0.12	54.73	73.19	23.84	0.33	49.43
NC330	North Carolina	302	[(B73*NC250)*B73(4)]	57.41	8.51	0.15	48.55	65.65	28.62	0.46	34.7
NC332	North Carolina	302	(SC76*B52); sister line of NC334	61.6	11.57	0.19	51.06	71.41	32.63	0.46	38.99
NC334	North Carolina	302	(SC76*B52); sister line of NC332	62.67	10.45	0.16	52.99	77.66	31.32	0.39	48.77
NC338	North Carolina	302	[PioneerX105A*H5] * [Pioneer304B*Agroceres504]	58.84	4.86	0.09	52.61	73.27	22.05	0.3	51.17
NC342	North Carolina	302	McNair inbreds 14*18(of Coker 811A x C103 origin)	60.8	19.84	0.33	44.53	74.63	39.86	0.53	36.83
NC344	North Carolina	302	TZ(2)*[(NC248*246)*C103]; Sister line of NC258	58.79	11.66	0.2	47.91	69.82	38.01	0.56	31.91
NC348	North Carolina	302	PioneerX105A * H-5 * Agroceres155	70.55	4.17	0.06	65.92	75.26	18.4	0.24	57.23
NC350	North Carolina	302	(H5*PioneerX105A)*H101	64.79	12.52	0.18	53.91	75.01	35.8	0.47	41.05
NC356	North Carolina	302	TROPHY SYN	56.74	6.38	0.12	49.27	70.27	22.63	0.33	46.51
NC358	North Carolina	302	TROPHY SYN	56.07	12.42	0.23	44.42	71.03	36.5	0.53	34.95
NC360	North Carolina	302	Agroceres155*PioneerX105A/NC262	60.59	10.04	0.16	50.99	70.06	26.07	0.38	43.1
NC362	North Carolina	302	Agroceres155*PioneerX105A/NC262	57.2	11.25	0.2	46.46	72.53	33.78	0.47	39.48
NC364	North Carolina	302	Agroceres155*PioneerX105A/NC262	56.88	6.85	0.13	49.1	69.4	22.23	0.34	45.68
NC366	North Carolina	302	FLA Syn	64.51	14.47	0.21	52.26	75.73	46.23	0.6	32.55
NC368	North Carolina	302	[B73*NC250]/[(B73*NC250)*B73]	62.83	7.25	0.11	55.36	66.27	24.75	0.4	39.08
NC370	North Carolina	302	[(SC76*B52)SC76(3)]	61.06	7.88	0.13	52.99	72.96	30.66	0.42	42.9
NC372	North Carolina	302	[(B73*Pa91)*B73]	57.36	8.05	0.14	48.81	68.52	30.82	0.47	36.65
ND246	North Dakota	302	W755*W771	65.04	7.89	0.12	57.34	80.3	19.88	0.24	62.82
Oh40B	Ohio	302	Eight line composite of Lancaster Surecrop lines	60.81	6.77	0.11	53.47	72.4	17.38	0.24	54.22
Oh43	Ohio	302	Oh40B*W8	59.08	8.67	0.15	50.27	63.18	24.46	0.42	35.1
Oh43E	Ohio	302	ERF/Oh43; ERF=LeamingxReid + other Pioneer inbreds	61.59	7.04	0.11	54.14	70.23	27.88	0.4	41.68
Oh603	Ohio	302	« Syn of Va58, OhS3267, H95, Va26, Coas. Trop. FL. »	54.92	9.13	0.18	45.4	66.62	23.71	0.37	40.51
Oh7b	Ohio	302	[(Oh07*38-11)Oh07]	56.58	6.63	0.12	48.92	71.07	24.73	0.35	45.7
Os420	Iowa	302	Osterland yellow dent	54.31	7.19	0.14	46.06	71.76	21.03	0.3	50.03
P39	Indiana	302	Purdue Bantam	49.16	6.65	0.16	40.77	67.47	17.38	0.27	47.44
Pa762	Pennsylvania	302	Oh43*Pa70L	59.1	10.38	0.18	49.12	62.68	23.58	0.42	35.21
Pa875	Pennsylvania	302	Wf9 Synthetic (original)	63	9.4	0.15	54.07	66.24	27.52	0.44	36.52
Pa880	Pennsylvania	302	Wf9 Synthetic C3	59.52	7.94	0.14	51.25	66.68	20.01	0.31	43.97
Pa91	Pennsylvania	302	(Wf9*Oh43)S4*[(38-11*L317)38-11]S4	62.96	10.57	0.16	53.23	72.59	30.19	0.42	42.84
R168	Illinois	302	Illinois Synthetic 60C	63.65	12.39	0.19	52.74	72.66	30.44	0.42	42.69
R177	Illinois	302	Germplasm 230B(Snelling Corn Borer Synthetic)	65.82	9	0.13	57.44	80.44	38.04	0.45	46.48
R229	Illinois	302	[(479*B73)B73(2)]S6; 479 is a Brazilian inbred of Tuxpeño type	64.34	6.98	0.11	57.19	69.36	29.21	0.43	39.28
R4	Illinois	302	Funk Yellow dent	54.72	7.36	0.16	46.38	69.69	18.43	0.27	49.54
SC357	South Carolina	302	[(Whately yellow * Tennessee Redcob) Young]	61.48	15.03	0.24	48.56	67.97	38.66	0.59	28.77
SC55	South Carolina	302	[(L501*L503)*(L548*L569)]	61.76	11.67	0.19	51.16	73.04	36.15	0.49	38.03
SD40	South Dakota	302	Pioneer hybrid 3709	64	9.58	0.15	55.04	71.69	21.67	0.31	49.34
SD44	South Dakota	302	SDp309*SD30	62.06	7.36	0.12	54.43	72.75	21.35	0.29	51.09
Sg1533	Indiana	302	Super gold	52.23	7.86	0.17	43.32	64.42	24.92	0.41	36.39
SG18	Indiana	302	Super gold	51.28	7.47	0.16	42.54	68.1	20.82	0.32	45.17
T232	Tennessee	302	Jellicorse*Teko yellow	63.07	11.42	0.18	52.77	76.34	44.39	0.57	35.07
T234	Tennessee	302	[T111*RB.L*III.A)]T111(4)	59.8	13.36	0.22	47.85	72.66	34.61	0.47	38.9
T8	Tennessee	302	Jarvis Golden Prolific	61.6	24.32	0.38	42.35	69.86	46.28	0.67	24.43
Tx303	Texas	302	Yellow Surcropper	65.09	6.58	0.1	58.29	75.85	19.23	0.25	57.28
Tx601	Texas	302	Yellow Tuxpan	61.01	17.53	0.28	46.34	71.22	45.18	0.64	27.31
Tzi10	Nigeria	302	Tlaltizapan 7844 x TZSR	54.31	10.26	0.21	43.95	68.29	36.56	0.55	31.12
Tzi11	Nigeria	302	Mo17 x RppSR	64.4	6.22	0.09	57.78	72.17	28.76	0.4	43.54
Tzi16	Nigeria	302	PI 540747 = N28/RPPTZSR-Y	59.69	7.18	0.12	51.96	70.55	27.47	0.39	42.5
Tzi18	Nigeria	302	Sete Lagoas 7728 x TZSR	60.51	7.52	0.13	52.62	69.97	20.53	0.3	48.01
Tzi25	Nigeria	302	[(B73*RPPSR-TZ)*B73(2)]	64.17	15.66	0.24	51.07	71.41	45.72	0.65	27.06
Tzi8	Nigeria	302	TZB x TZSR	65.7	2.39	0.04	63.11	74.74	5.76	0.08	68.88
Tzi9	Nigeria	302	SIDS7734/TZSR	65.49	14.04	0.2	53.64	73.21	33.8	0.46	40.39
U267Y	South Africa	302	WF9r*Mex.155^3	58.09	5.57	0.1	51.3	76	17.5	0.23	59.07
Va102	Virginia	302	Va59*Va60	57.44	7.03	0.13	49.6	72.08	26.04	0.37	45.9
Va14	Virginia	302	[(VaCBS selection*Va17)Va17]	59.78	15.51	0.26	46.37	71.29	41.64	0.59	30.61
Va17	Virginia	302	Wf9*T8	67.27	16.42	0.23	53.97	82.24	49.53	0.56	38.51
Va22	Virginia	302	Va17*C103 backcross	58.19	21.26	0.37	40.7	72.74	46.71	0.64	28
Va26	Virginia	302	Oh43*K155	55.62	7.27	0.14	47.44	75.55	20.61	0.27	55.61
Va35	Virginia	302	[(C103*T8)T8]	61.41	18.62	0.29	46.03	72.5	41.19	0.57	32.69
Va59	Virginia	302	[(C103*T8(2))*(K4*C103(2))]	64.26	9.98	0.15	55.06	73.68	33.11	0.45	41.67
Va85	Virginia	302	Virginia Long Ear Synthetic	54.3	7.97	0.16	45.51	67.81	23.53	0.36	42.31
Va99	Virginia	302	Oh07B*Pa91	63.49	8.1	0.13	55.49	76.12	31.44	0.4	46.55
VaW6	Virginia	302	unknown	63	2.74	0.05	58.61	75.66	9.06	0.12	66.28
W117HT	Wisconsin	302	W117=643*Minnesota No.13	57.68	8.94	0.16	48.55	77.54	32.83	0.41	47.23
W153R	Wisconsin	302	[(la153*W8)la153]	65.49	16.23	0.23	52.14	73.54	53.63	0.72	22.8
W182B	Wisconsin	302	WD*W22	55.18	9.12	0.18	45.69	70.58	27.21	0.39	42.77
W22	Wisconsin	302	III.B10*W25	59.82	7.78	0.13	52	75.36	31.99	0.42	43.54
W401	Wisconsin	302	[(33*Wisconsin No.25)*67C]	63.81	16.1	0.24	50.39	75.81	50	0.64	29.24
W64A	Wisconsin	302	Wf9*CI.187-2	59.77	8.66	0.15	51.04	73.94	24.68	0.33	49.7
Wf9	Indiana	302	Reid yellow dent (Indiana station strain)	61.2	7.66	0.13	53.28	75.95	22.09	0.29	54.83
